# Supplementary material for: 18:0 Lyso PC Derived by Bioactivity-Based Molecular Networking from Lentil Mutant Lines and Its Effects on High-Fat Diet-Induced Obese Mice
Source: MDPI journal article supplement (doi:10.3390/molecules26247547), 2021-12-13
Supplement: s1 [file s1]

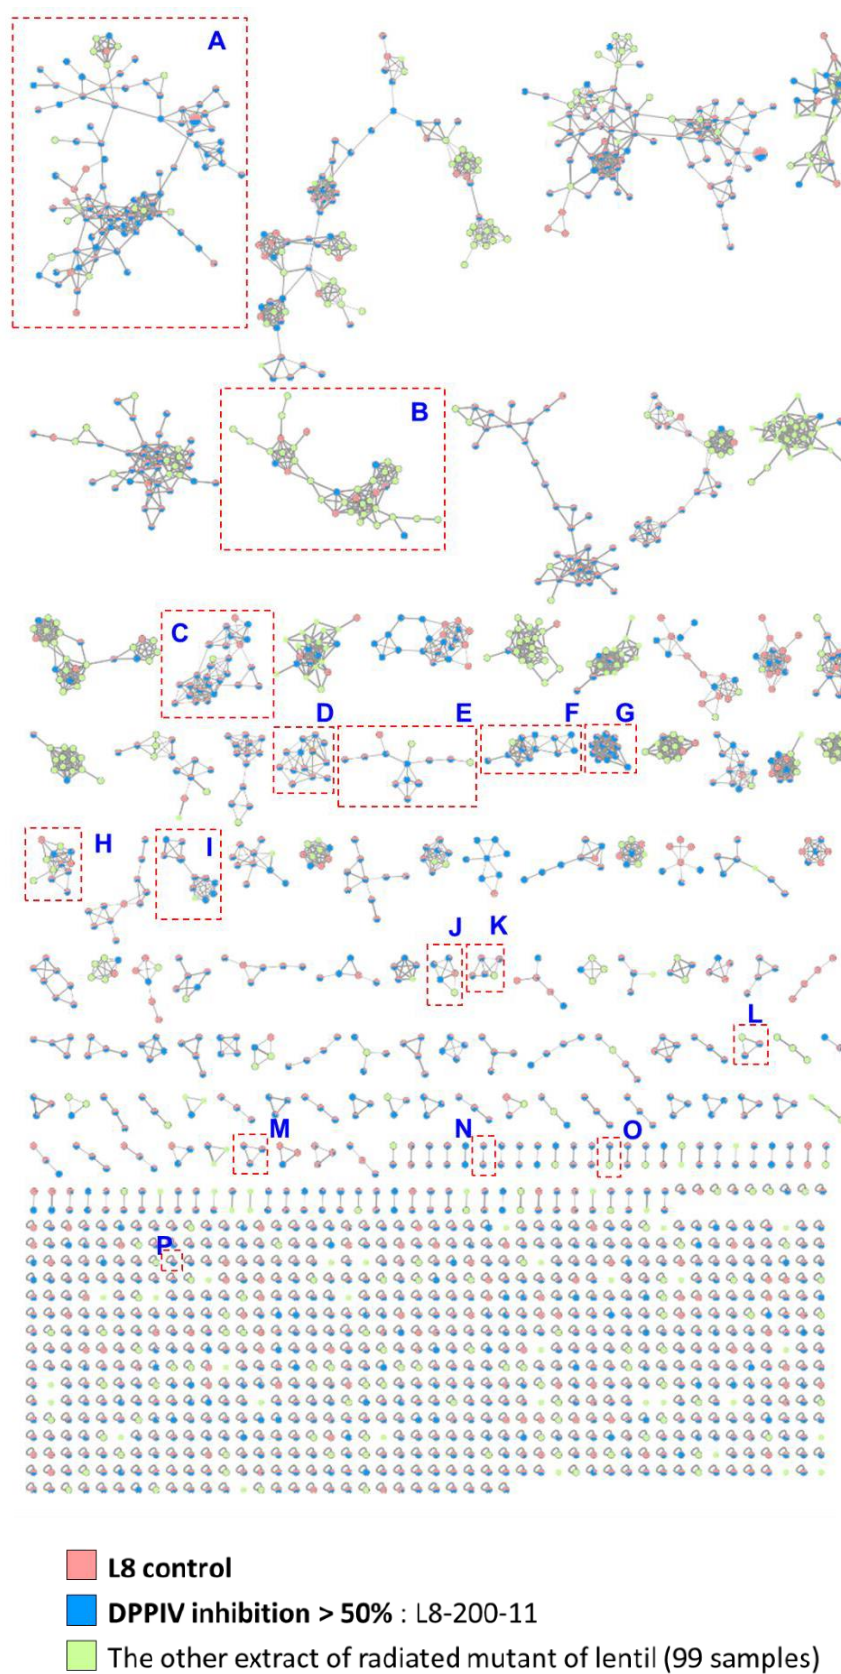

**Figure S1.** Feature-based molecular networking of L8 radiated mutants.

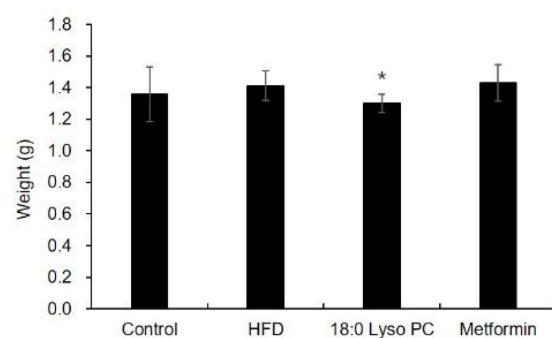

**Figure S2.** Effect of 18:0 Lyso PC on liver weigh in high-fat diet-fed mice after 8 weeks. The results are presented as mean  $\pm$  SD ( $n = 6$ ). Significant difference was identified at  $*p < 0.05$ , the high fat diet group vs the treatment group.

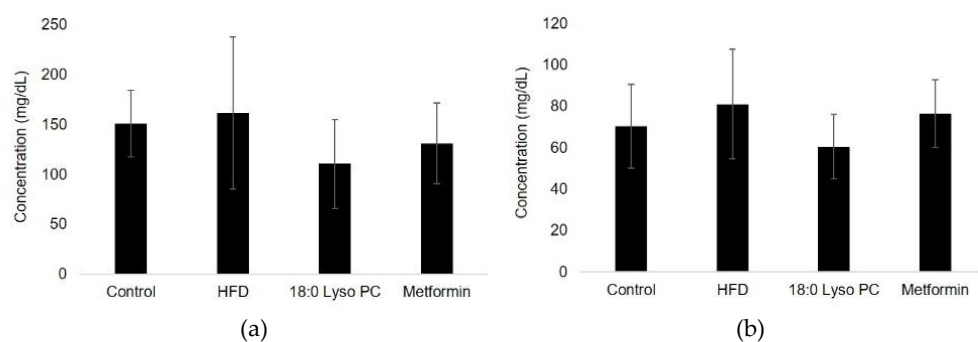

**Figure S3.** Effect of 18:0 Lyso PC on **(a)** the concentrations of aspartate transaminase and **(b)** alanine transaminase in serum of high fat diet-fed mice. Significant differences were not observed.

Normal Diet

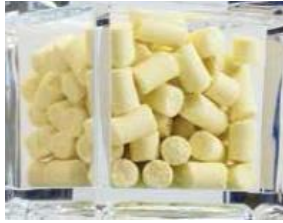

| Product #                             | D12450B |       |
|---------------------------------------|---------|-------|
|                                       | gm%     | kcal% |
| Protein                               | 19.2    | 20.0  |
| Carbohydrate                          | 67.3    | 70.0  |
| Fat                                   | 4.3     | 10.0  |
| Total                                 |         | 100.0 |
| kcal/gm                               | 3.85    |       |
| Ingredient                            | gm      | kcal  |
| Casein, 30 Mesh                       | 200     | 800   |
| L-Cystine                             | 3       | 12    |
|                                       |         |       |
| Corn Starch                           | 315     | 1260  |
| Maltodextrin 10                       | 35      | 140   |
| Sucrose                               | 350     | 1400  |
|                                       |         |       |
| Cellulose, BW200                      | 50      | 0     |
|                                       |         |       |
| Soybean Oil                           | 25      | 225   |
| Lard                                  | 20      | 180   |
|                                       |         |       |
| Mineral Mix S10026                    | 10      | 0     |
| DiCalcium Phosphate                   | 13      | 0     |
| Calcium Carbonate                     | 5.5     | 0     |
| Potassium Citrate, 1 H <sub>2</sub> O | 16.5    | 0     |
|                                       |         |       |
| Vitamin Mix V10001                    | 10      | 40    |
| Choline Bitartrate                    | 2       | 0     |
|                                       |         |       |
| FD&C Yellow Dye #5                    | 0.05    | 0     |
| FD&C Red Dye #40                      | 0       | 0     |
| FD&C Blue Dye #1                      | 0       | 0     |
|                                       |         |       |
| Total                                 | 1055.05 | 4057  |

High Fat Diet

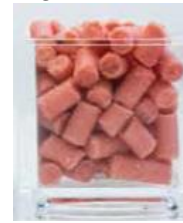

| Product #                             | D12451 |       |
|---------------------------------------|--------|-------|
|                                       | gm%    | kcal% |
| Protein                               | 24     | 20.0  |
| Carbohydrate                          | 41     | 35.0  |
| Fat                                   | 24     | 45.0  |
| Total                                 |        | 100.0 |
| kcal/gm                               | 4.73   |       |
| Ingredient                            | gm     | kcal  |
| Casein, 30 Mesh                       | 200    | 800   |
| L-Cystine                             | 3      | 12    |
|                                       |        |       |
| Corn Starch                           | 72.8   | 291   |
| Maltodextrin 10                       | 100    | 400   |
| Sucrose                               | 172.8  | 691   |
|                                       |        |       |
| Cellulose, BW200                      | 50     | 0     |
|                                       |        |       |
| Soybean Oil                           | 25     | 225   |
| Lard                                  | 177.5  | 1598  |
|                                       |        |       |
| Mineral Mix S10026                    | 10     | 0     |
| DiCalcium Phosphate                   | 13     | 0     |
| Calcium Carbonate                     | 5.5    | 0     |
| Potassium Citrate, 1 H <sub>2</sub> O | 16.5   | 0     |
|                                       |        |       |
| Vitamin Mix V10001                    | 10     | 40    |
| Choline Bitartrate                    | 2      | 0     |
|                                       |        |       |
| FD&C Red Dye #40                      | 0.05   | 0     |
| FD&C Blue Dye #1                      | 0      | 0     |
|                                       |        |       |
| Total                                 | 858.15 | 4057  |

**Figure S4.** Information of the compositions of the normal diet and the high-fat diet.

**Table S1.** Annotated molecular node by Global Natural Product Social Molecular Networking library in feature-based molecular networking applied with a L8 control and 100 radiated mutant samples.

| Group | Observed <i>m/z</i>                | Matched library ID                                                                                                                                                                                                             | Class                          |                                                                                                           |                          |
|-------|------------------------------------|--------------------------------------------------------------------------------------------------------------------------------------------------------------------------------------------------------------------------------|--------------------------------|-----------------------------------------------------------------------------------------------------------|--------------------------|
| A     | 277.2157<br>/277.2161              | 9,12-Octadecadiynoic Acid                                                                                                                                                                                                      | Fatty acid derivative          |                                                                                                           |                          |
|       | 293.2108                           | 9(S)-HpOTrE                                                                                                                                                                                                                    |                                |                                                                                                           |                          |
|       | 279.2318<br>/281.2473              | Linolenic acid                                                                                                                                                                                                                 |                                |                                                                                                           |                          |
|       | 315.2531                           | 12,13-DiHOME                                                                                                                                                                                                                   |                                |                                                                                                           |                          |
|       | 277.2162                           | 9-Oxo-10E,12Z-octadecadienoic acid                                                                                                                                                                                             |                                |                                                                                                           |                          |
|       | 353.2685<br>/353.2687<br>/357.2999 | Monolinolenin (9c,12c,15c)                                                                                                                                                                                                     |                                |                                                                                                           |                          |
|       | 300.2896                           | Palmitoyl ethanolamide                                                                                                                                                                                                         |                                |                                                                                                           |                          |
|       | 324.2898<br>/324.2896              | Linoleoyl ethanolamide                                                                                                                                                                                                         |                                |                                                                                                           |                          |
|       | 295.2262                           | 13-Keto-9Z,11E-octadecadienoic acid                                                                                                                                                                                            |                                |                                                                                                           |                          |
|       | 297.2424<br>/315.2531              | 9,10-Dihydroxy-12Z-octadecenoic acid                                                                                                                                                                                           |                                |                                                                                                           |                          |
|       | 326.3053                           | N-Oleoylethanolamine                                                                                                                                                                                                           |                                |                                                                                                           |                          |
|       | 331.2848                           | 1-Hexadecanoyl-sn-glycerol                                                                                                                                                                                                     |                                |                                                                                                           |                          |
|       | B                                  | 786.6004                                                                                                                                                                                                                       |                                | 1-Stearoyl-2-linoleoyl-sn-glycero-3-phosphocholine<br>(18:0/18:2 Lyso PC)                                 | Phosphatidylcholine      |
|       | C                                  | 420.1866                                                                                                                                                                                                                       |                                | Phenylmethyl-6-O-[(2R,3R,4R)-tetrahydro-3,4-dihydroxy-4-(hydroxymethyl)-2-furanyl]-beta-D-Glucopyranoside | Carbohydrate             |
|       |                                    | 325.1130                                                                                                                                                                                                                       |                                | 4-O-beta-Galactopyranosyl-D-mannopyranose                                                                 |                          |
|       |                                    | 360.1502                                                                                                                                                                                                                       |                                | Isomaltulose                                                                                              |                          |
| D     | 291.0865                           | Catechin                                                                                                                                                                                                                       | Flavonoid                      |                                                                                                           |                          |
|       | 453.1394                           | (2R,3R,4S,5S,6R)-2-[[2-(3,4-Dihydroxyphenyl)-5,7-dihydroxy-3,4-dihydro-2H-chromen-3-yl]oxy]-6-(hydroxymethyl)oxane-3,4,5-triol                                                                                                 |                                |                                                                                                           |                          |
| E     | 518.3212                           | 1-Hexadecanoyl-sn-glycero-3-phosphocholine<br>(16:0 Lyso PC)                                                                                                                                                                   | Phosphatidylcholine            |                                                                                                           |                          |
|       | 544.3371                           | 1-(9Z-Octadecenoyl)-sn-glycero-3-phosphocholine<br>(18:1 Lyso PC)                                                                                                                                                              |                                |                                                                                                           |                          |
| F     | 175.1188                           | Arginine                                                                                                                                                                                                                       | Amino acid derivative          |                                                                                                           |                          |
| G     | 518.3328                           | 1-(9Z,12Z,15Z-octadecatrienoyl)-sn-glycero-3-phosphocholine<br>(18:3 Lyso PC)                                                                                                                                                  | Phosphatidylcholine            |                                                                                                           |                          |
|       | 482.3247                           | 1-Pentadecanoyl-sn-glycero-3-phosphocholine<br>(15:0 Lyso PC)                                                                                                                                                                  |                                |                                                                                                           |                          |
|       | 524.3717                           | 1-Stearoyl-2-hydroxy-sn-glycero-3-phosphocholine<br>(18:0 Lyso PC)                                                                                                                                                             |                                |                                                                                                           |                          |
|       | 522.3559                           | 1-(9Z-Octadecenoyl)-sn-glycero-3-phosphocholine<br>(18:1 Lyso PC)                                                                                                                                                              |                                |                                                                                                           |                          |
|       | 468.3089                           | 1-Myristoyl-sn-glycero-3-phosphocholine<br>(14:0 Lyso PC)                                                                                                                                                                      |                                |                                                                                                           |                          |
|       | H                                  | 480.3086                                                                                                                                                                                                                       |                                | 1-(9Z-Octadecenoyl)-sn-glycero-3-phosphoethanolamine<br>(18:1 Lyso PE)                                    | Phosphatidylethanolamine |
| I     | 247.1442                           | Lenticin                                                                                                                                                                                                                       | Aromatic amino acid derivative |                                                                                                           |                          |
| J     | 328.1392                           | N-(1-Deoxy-1-fructosyl)phenylalanine                                                                                                                                                                                           | Aromatic amino acid derivative |                                                                                                           |                          |
| K     | 757.2191                           | 5,7-Dihydroxy-2-[4-[(2S,3R,4S,5S,6R)-3,4,5-trihydroxy-6-(hydroxymethyl)oxan-2-yl]oxyphenyl]-3-[(2S,3R,4S,5S,6R)-3,4,5-trihydroxy-6-[[[(2R,3R,4R,5R,6S)-3,4,5-trihydroxy-6-methyloxan-2-yl]oxymethyl]oxan-2-yl]oxychromen-4-one | Flavonoid glycoside            |                                                                                                           |                          |

|   |          |                                                                                                                                         |                                |
|---|----------|-----------------------------------------------------------------------------------------------------------------------------------------|--------------------------------|
| L | 387.2015 | (4S)-4-Hydroxy-3,5,5-trimethyl-4-[(E)-3-[(2R,3R,4S,5S,6R)-3,4,5-trihydroxy-6-(hydroxymethyl)oxan-2-yl]oxybut-1-enyl]cyclohex-2-en-1-one | Terpenoid glycoside            |
| M | 205.0972 | L-Tryptophan                                                                                                                            | Aromatic amino acid derivative |
| N | 182.0813 | L-Tyrosine                                                                                                                              | Aromatic amino acid derivative |
| O | 579.1501 | Procyanidin B3                                                                                                                          | Procyanidin                    |
| P | 255.0652 | 7,4'-Dihydroxyflavone                                                                                                                   | Flavonoid                      |

**Table S2.** Significant differences  $p$  values for the effect of 18:0 Lyso PC on changes in body weight during the entire experimental period.

|                     | Days     |          |          |          |          |          |          |          |          |
|---------------------|----------|----------|----------|----------|----------|----------|----------|----------|----------|
|                     | 0        | 7        | 14       | 21       | 28       | 35       | 42       | 49       | 56       |
| Control vs HFD      | 0.337225 | 0.800899 | 0.295365 | 0.006532 | 0.002758 | 0.003044 | 0.000005 | 0.000003 | 0.000002 |
| HFD vs 18:0 Lyso PC | 0.417169 | 0.389523 | 0.077717 | 0.000657 | 0.006785 | 0.039776 | 0.003320 | 0.003589 | 0.001395 |
| HFD vs metformin    | 0.529554 | 0.655448 | 0.108034 | 0.003841 | 0.129756 | 0.072521 | 0.004325 | 0.002096 | 0.004165 |
